# Supplementary material for: A fluorescence nanosensor for lipase activity: enzyme-regulated quantum dots growth in situ
Source: Royal Society of Chemistry journal article supplement (doi:10.1039/c5ra08902f), 2015-01-01
Supplement: c5ra08902f1.pdf [file c5ra08902f1.pdf]

## Electronic Supporting Information

### **A fluorescence nanosensor for lipase activity: enzyme-regulated quantum dots growth in situ**

Wei Zhang<sup>†a</sup>, Jia Liu<sup>†a</sup>, Lei Zhang<sup>b</sup>, Jian-hong Gan<sup>a</sup>, Yaqi Ding<sup>a</sup>, Wei Huang<sup>c</sup>, Feng-wei Huo<sup>c</sup>, and Danbi Tian<sup>a\*</sup>

<sup>a</sup> College of Chemistry and Molecular Engineering, Nanjing Tech University, 30 South Puzhu Road, Nanjing 211816, China.

<sup>b</sup> Key Laboratory for Organic Electronics and Information Displays & Institute of Advanced Materials (IAM), National Synergistic Innovation Center for Advanced Materials (SICAM), Nanjing University of Posts & Telecommunications, 9 Wenyuan Road, Nanjing 210023, China.

<sup>c</sup> Key Laboratory of Flexible Electronics (KLOFE) & Institute of Advanced Materials (IAM), National Synergistic Innovation Center for Advanced Materials (SICAM), Nanjing Tech University (NanjingTech), 30 South Puzhu Road, Nanjing 211816, China.

\* To whom correspondence should be addressed. Phone/Fax: +86 25 86210899; E-mail: danbi@njtech.edu.cn.

† These authors have contributed equally.

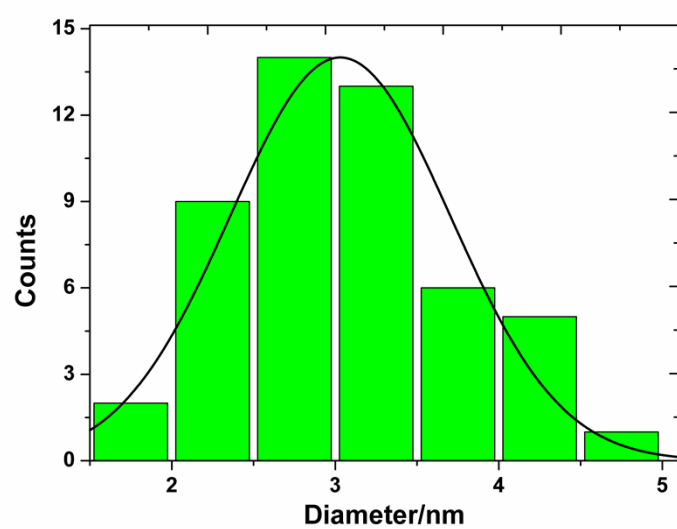

**Fig. S1** Distribution of CdS QDs diameter determined by TEM image analysis.

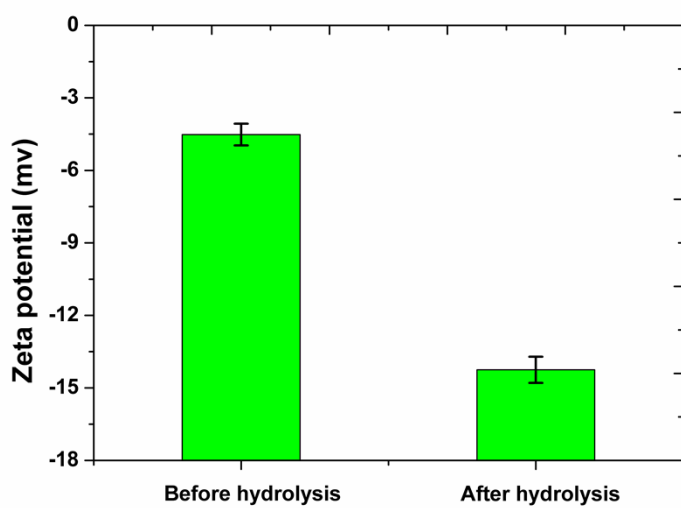

**Fig. S2** The zeta potential of the assay system, before and after addition of 2.0 mg mL<sup>-1</sup> lipase.

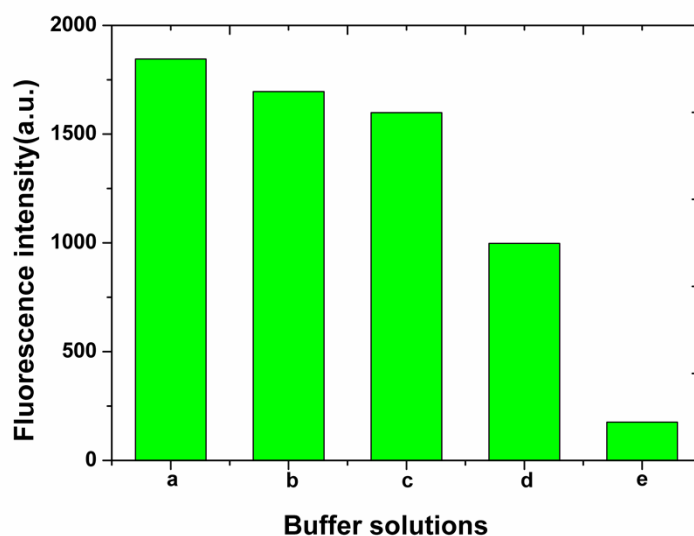

**Fig.S3** Fluorescence intensity of the assay system in different buffer solutions including a. Tris-HCl; b.  $\text{KH}_2\text{PO}_4\text{-NaOH}$ ; c.  $\text{Na}_2\text{HPO}_4\text{-citric acid}$ ; d. PBS; e.  $\text{H}_2\text{O}$  (pH=8.0) in the presence of  $2 \text{ mg mL}^{-1}$  lipase.

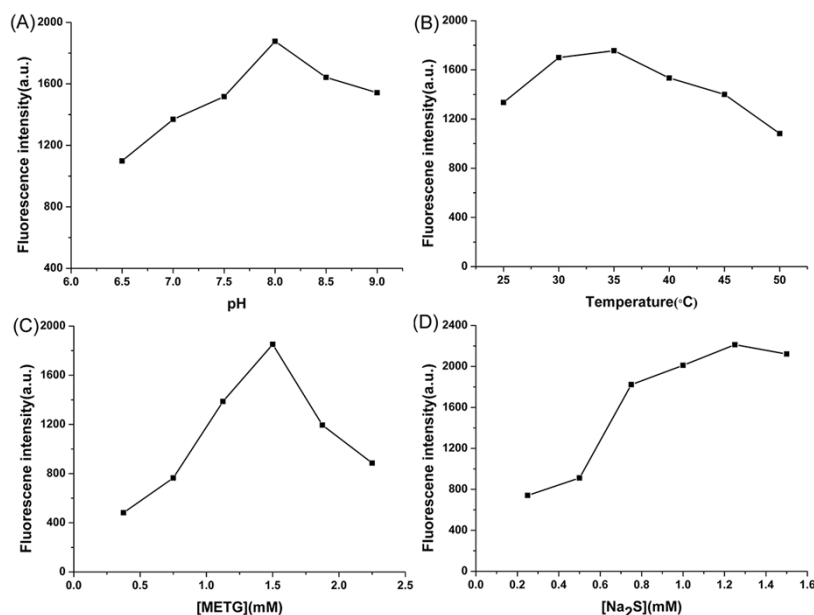

**Fig.S4** (A) Effects of pH; (B) Effects of temperature; (C) Effects of the substrate concentration (METG); (D) Effects of sodium sulfide. The experiments were performed with  $2.0 \text{ mg mL}^{-1}$  lipase.

**Table.S1** Use of METG as substrate in pH-stat method for detecting the hydrolytic activity of commercial lipases. All assays were performed with  $0.02 \text{ g}$  lipase at  $35^\circ\text{C}$  and pH 8.0 for 10 min.

| Lipase                 | CRL    | PPL    | SBE-01Li | RNL   |
|------------------------|--------|--------|----------|-------|
| $V_{\text{NaOH}}$ (mL) | 7.82   | 5.60   | 5.20     | 4.05  |
| Activity (U/g)         | 189.24 | 135.52 | 125.84   | 98.01 |
